# Supplementary material for: Insights into understanding water mediated proton conductivity in an intercalated hybrid solid of kaolinite at ambient temperature
Source: Royal Society of Chemistry journal article supplement (doi:10.1039/c6nj02386j), 2016-01-01
Supplement: c6nj02386j1.pdf [file c6nj02386j1.pdf]

## Electronic Supporting Information

### **Insights into understanding water mediated proton conductivity in intercalated hybrid solid of kaolinite at ambient temperature**

Hao Yang,<sup>a</sup> Xin Sun,<sup>a</sup> Shao-Xian Liu,<sup>a</sup> Yang Zou,<sup>\*a</sup> Li Li,<sup>a</sup> Jian-Lan Liu,<sup>a</sup> Xiao-Ming Ren<sup>\*a,b,c</sup>

<sup>a</sup> *State Key Laboratory of Materials-Oriented Chemical Engineering and College of Chemistry and Molecular Engineering, Nanjing Tech University, Nanjing 210009, People's Republic of China*

<sup>b</sup> *College of Materials Science and Engineering, Nanjing Tech University, Nanjing 210009, People's Republic of China*

<sup>c</sup> *State Key Laboratory & Coordination Chemistry Institute, Nanjing University, Nanjing 210093, People's Republic of China*

Phone: +86 25 58139476

Fax: +86 25 58139481

E-mail: [xmren@njtech.edu.cn](mailto:xmren@njtech.edu.cn)

## Contents

Fig. S1: (a) Nyquist plots of K-Ala at  $T = 303$  K under the selected relative humidity: (a) anhydrous condition, (b) 45% RH, (c) 50% RH, (d) 58% RH, (e) 67% RH, (f) 99% RH.

Fig. S2: Nyquist plots with fitted curve (green dots), inset: the equivalent circuit diagram.

Table S1: Comparison of bond lengths ( $\text{\AA}$ ) and bond angles ( $^\circ$ ) of  $\text{AlO}_6$  and  $\text{SiO}_4$  species in the optimized structures of raw kaolinite, K-Ala, K-Ala- $\text{H}_2\text{O}$  and K-Ala- $2\text{H}_2\text{O}$ , respectively

Table S2: Comparison of bond lengths ( $\text{\AA}$ ) and bond angles ( $^\circ$ ) of Ala molecule in the optimized structures of single crystal, K-Ala and K-Ala- $\text{H}_2\text{O}$  and K-Ala- $2\text{H}_2\text{O}$ , respectively

References

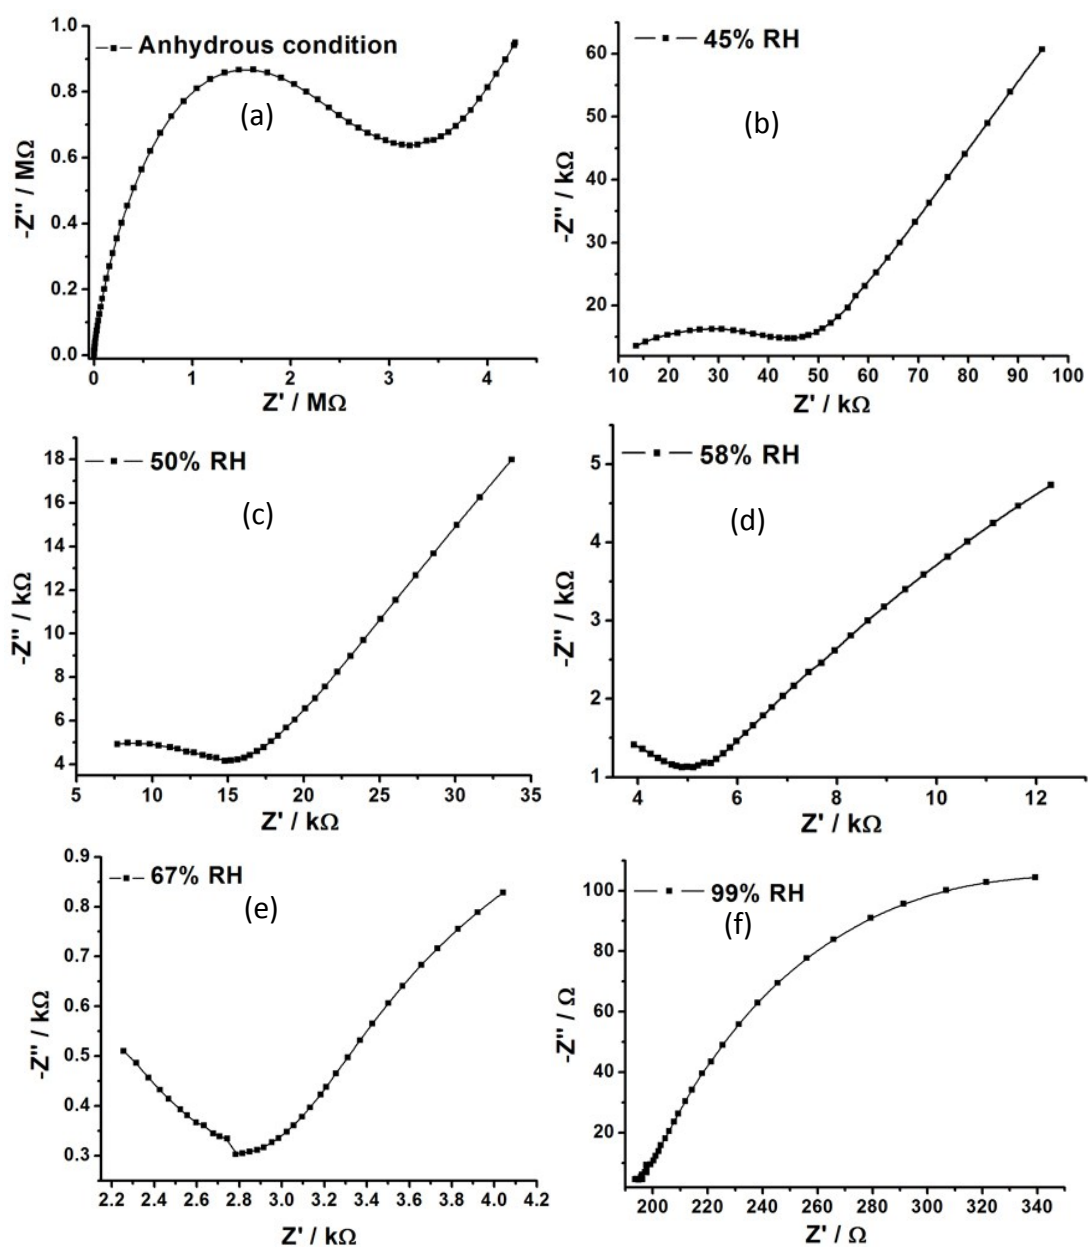

Fig. S1: (a) Nyquist plots of K-Ala at  $T = 303$  K under the selected relative humidity: (a) anhydrous condition, (b) 45% RH, (c) 50% RH, (d) 58% RH, (e) 67% RH, (f) 99% RH.

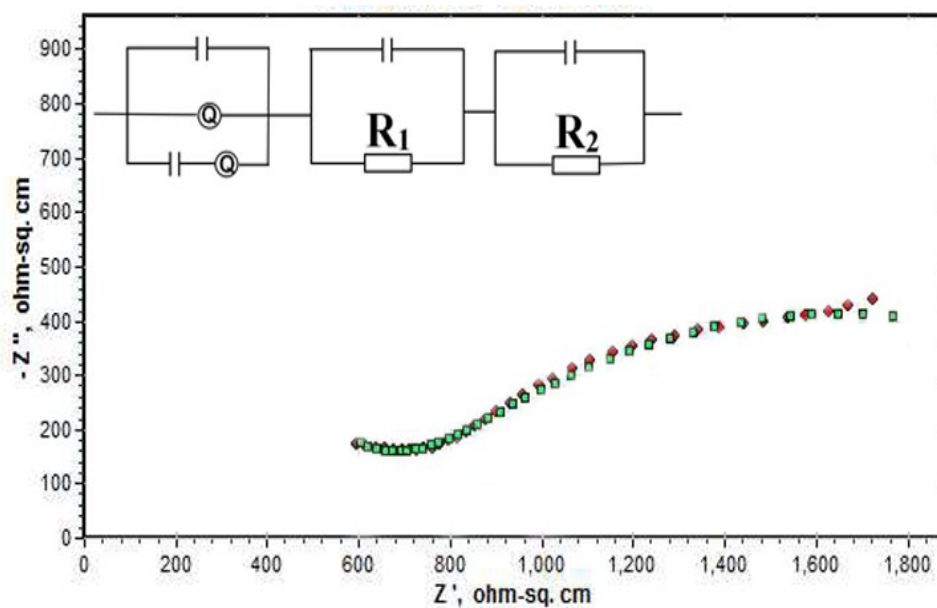

Fig. S2: Nyquist plots with fitted curve (green dots), inset: the equivalent circuit diagram.

Table S1: Comparison of bond lengths (Å) and bond angles (°) of  $\text{AlO}_6$  and  $\text{SiO}_4$  species in the optimized structures of raw kaolinite, K-Ala, K-Ala- $\text{H}_2\text{O}$  and K-Ala- $2\text{H}_2\text{O}$ , respectively

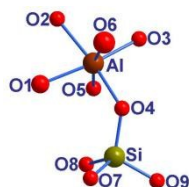

| Molecular fragment            | Single crystal <sup>1</sup>       | Optimized K-Ala | Optimized K-Ala- $\text{H}_2\text{O}$ | K-Ala- $2\text{H}_2\text{O}$ |        |
|-------------------------------|-----------------------------------|-----------------|---------------------------------------|------------------------------|--------|
| <i>Bond distances</i>         |                                   |                 |                                       |                              |        |
| $\text{AlO}_6$<br>Octahedron  | Al-O <sub>1</sub>                 | 1.912           | 1.920                                 | 1.932                        | 1.930  |
|                               | Al-O <sub>2</sub>                 | 1.915           | 1.941                                 | 1.876                        | 1.863  |
|                               | Al-O <sub>3</sub>                 | 1.868           | 1.937                                 | 1.854                        | 1.847  |
|                               | Al-O <sub>4</sub>                 | 1.930           | 1.946                                 | 1.873                        | 1.869  |
|                               | Al-O <sub>5</sub>                 | 1.927           | 1.943                                 | 1.850                        | 1.932  |
|                               | Al-O <sub>6</sub>                 | 1.892           | 1.963                                 | 1.841                        | 1.921  |
| $\text{SiO}_4$<br>Tetrahedron | Si-O <sub>4</sub>                 | 1.613           | 1.629                                 | 1.628                        | 1.638  |
|                               | Si-O <sub>7</sub>                 | 1.608           | 1.625                                 | 1.589                        | 1.635  |
|                               | Si-O <sub>8</sub>                 | 1.618           | 1.638                                 | 1.617                        | 1.645  |
|                               | Si-O <sub>9</sub>                 | 1.613           | 1.624                                 | 1.587                        | 1.591  |
| <i>Bond angles</i>            |                                   |                 |                                       |                              |        |
| $\text{AlO}_6$<br>Octahedron  | O <sub>1</sub> -Al-O <sub>2</sub> | 76.677          | 78.194                                | 71.490                       | 69.681 |
|                               | O <sub>1</sub> -Al-O <sub>4</sub> | 93.661          | 92.733                                | 96.043                       | 96.453 |
|                               | O <sub>3</sub> -Al-O <sub>2</sub> | 93.980          | 99.799                                | 99.407                       | 100.40 |

|                  |                                   |        |        |        |        |
|------------------|-----------------------------------|--------|--------|--------|--------|
|                  | O <sub>3</sub> -Al-O <sub>4</sub> | 97.004 | 90.280 | 94.605 | 95.112 |
|                  | O <sub>5</sub> -Al-O <sub>1</sub> | 93.433 | 88.894 | 96.659 | 97.621 |
|                  | O <sub>5</sub> -Al-O <sub>2</sub> | 96.270 | 89.236 | 92.004 | 93.117 |
|                  | O <sub>5</sub> -Al-O <sub>3</sub> | 77.752 | 75.980 | 72.777 | 71.611 |
|                  | O <sub>5</sub> -Al-O <sub>4</sub> | 93.419 | 95.705 | 99.538 | 99.461 |
|                  | O <sub>6</sub> -Al-O <sub>1</sub> | 94.835 | 98.616 | 87.427 | 87.138 |
|                  | O <sub>6</sub> -Al-O <sub>2</sub> | 93.743 | 97.317 | 95.774 | 95.933 |
|                  | O <sub>6</sub> -Al-O <sub>3</sub> | 95.472 | 96.583 | 104.21 | 104.98 |
|                  | O <sub>6</sub> -Al-O <sub>4</sub> | 77.751 | 78.873 | 73.192 | 72.089 |
|                  | O <sub>4</sub> -Si-O <sub>7</sub> | 113.43 | 110.64 | 104.58 | 107.44 |
|                  | O <sub>4</sub> -Si-O <sub>8</sub> | 109.99 | 108.76 | 108.72 | 103.84 |
| SiO <sub>4</sub> | O <sub>4</sub> -Si-O <sub>9</sub> | 111.65 | 111.87 | 111.84 | 112.38 |
| Tetrahedron      | O <sub>7</sub> -Si-O <sub>8</sub> | 105.81 | 105.68 | 112.68 | 105.92 |
|                  | O <sub>8</sub> -Si-O <sub>9</sub> | 106.43 | 107.57 | 106.58 | 113.09 |
|                  | O <sub>9</sub> -Si-O <sub>7</sub> | 109.16 | 112.04 | 112.51 | 114.18 |

Table S2: Comparison of bond lengths (Å) and bond angles (°) of Ala molecule in the optimized structures of single crystal, K-Ala and K-Ala-H<sub>2</sub>O and K-Ala-2H<sub>2</sub>O, respectively

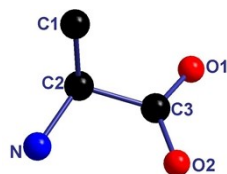

| Molecular fragment                             | Single crystal <sup>2</sup> | Optimized Ala | K-Ala-H <sub>2</sub> O | Optimized K-Ala-2H <sub>2</sub> O |
|------------------------------------------------|-----------------------------|---------------|------------------------|-----------------------------------|
| <i>Bond distances</i>                          |                             |               |                        |                                   |
| C <sub>1</sub> -C <sub>2</sub>                 | 1.520                       | 1.509         | 1.519                  | 1.525                             |
| C <sub>2</sub> -C <sub>3</sub>                 | 1.533                       | 1.570         | 1.554                  | 1.569                             |
| C <sub>3</sub> -O <sub>1</sub>                 | 1.251                       | 1.281         | 1.274                  | 1.274                             |
| C <sub>3</sub> -O <sub>2</sub>                 | 1.251                       | 1.299         | 1.267                  | 1.266                             |
| C <sub>2</sub> -N                              | 1.481                       | 1.525         | 1.516                  | 1.521                             |
| <i>Bond angles</i>                             |                             |               |                        |                                   |
| C <sub>1</sub> -C <sub>2</sub> -C <sub>3</sub> | 110.97                      | 117.32        | 106.93                 | 108.00                            |
| C <sub>1</sub> -C <sub>2</sub> -N              | 109.83                      | 102.84        | 103.08                 | 104.06                            |
| C <sub>2</sub> -C <sub>3</sub> -O <sub>1</sub> | 116.59                      | 114.49        | 117.00                 | 117.08                            |
| C <sub>2</sub> -C <sub>3</sub> -O <sub>2</sub> | 117.51                      | 118.79        | 113.57                 | 113.69                            |
| O <sub>1</sub> -C <sub>3</sub> -O <sub>2</sub> | 125.90                      | 126.46        | 129.42                 | 129.22                            |
| C <sub>3</sub> -C <sub>2</sub> -N              | 110.51                      | 106.48        | 110.50                 | 109.84                            |

## References

- 1 D. L. Bish, *Clays Clay Miner.*, 1993, **41**, 738.
- 2 F. Kimura, W. Oshima, H. Matsumoto, H. Uekusa, K. Aburaya, M. Maeyama and T. Kimura, *CrystEngComm.*, 2014, **16**, 6630.
